# Supplementary material for: Biogeography in the air: fungal diversity over land and oceans
Source: Copernicus journal article supplement (doi:10.5194/bg-9-1125-2012), 2012-03-27
Supplement: Supplementary file 1 [file bg-9-1125-2012-supplement.pdf]

1 **Supplementary Material for the manuscript:**

2 **Biogeography in the air: fungal diversity over land and**  
3 **oceans**

4  
5 **Janine Fröhlich-Nowoisky<sup>1,2</sup>, Susannah M. Burrows<sup>3</sup>, Zhouqing Xie<sup>1,4</sup>, Guenter**  
6 **Engling<sup>5,6</sup>, Paul A. Solomon<sup>7</sup>, Matthew P. Fraser<sup>8</sup>, Olga L. Mayol-Bracero<sup>9</sup>, Paulo**  
7 **Artaxo<sup>10</sup>, Dominik Begerow<sup>11</sup>, Ralf Conrad<sup>12</sup>, Meinrat O. Andreae<sup>1</sup>, Viviane R.**  
8 **Després<sup>2,13</sup> and Ulrich Pöschl<sup>1,2</sup>**

9 <sup>1</sup>Biogeochemistry Department, Max Planck Institute for Chemistry, P.O. Box 3060, 55020  
10 Mainz, Germany

11 <sup>2</sup>Earth System Science Center, Institute of Geosciences, Johannes Gutenberg University, Joh.-  
12 Joachim-Becher-Weg 21, 55128 Mainz, Germany

13 <sup>3</sup>Atmospheric Chemistry Department, Max Planck Institute for Chemistry, P.O. Box 3060, 55020  
14 Mainz, Germany

15 <sup>4</sup>Institute of Polar Environment, University of Science and Technology of China, Hefei, Anhui,  
16 230026, China

17 <sup>5</sup>Department of Biomedical Engineering and Environmental Sciences, National Tsing Hua Uni-  
18 versity, Hsinchu 300, Taiwan

19 <sup>6</sup>Research Center for Environmental Changes, Academia Sinica, Taipei 115, Taiwan

20 <sup>7</sup>Office of Research and Development, National Exposure Laboratory, US EPA - Las Vegas, 944  
21 E. Harmon Ave, Rm. 235 Las Vegas, Nevada 89119, USA

22 <sup>8</sup>Global Institute of Sustainability, Arizona State University, PO Box 875402, Tempe, AZ 85287-  
23 5402, USA

24 <sup>9</sup>Institute for Tropical Ecosystem Studies, University of Puerto Rico, PO Box 70377, San Juan,  
25 PR 00936-8377, USA

26 <sup>10</sup>Instituto de Física, Universidade de Sao Paulo, Sao Paulo, 05508-900 SP, Brazil

1 <sup>11</sup>Department of Evolution and Biodiversity of Plants, Geobotany Section, Ruhr-Universität Bo-  
2 chum, Universitätsstraße 150, 44780 Bochum, Germany

3 <sup>12</sup>Max Plank Institute for Terrestrial Microbiology, Karl-von-Frisch-Straße, Marburg 35043,  
4 Germany

5 <sup>13</sup>Institute of General Botany, Johannes Gutenberg University, Johannes-von-Müller-Weg 6,  
6 55128 Mainz, Germany

7 Correspondence to: J. Fröhlich-Nowoisky (j.frohlich@mpic.de)

8

9 To complement the information given in the main manuscript, the following sections provide  
10 Supplementary Text, Supplementary Figures S1-S4 and Legends, Supplementary Tables S1-S12,  
11 and Supplementary References.

## 1 **Supplementary Text**

2 **Blank and Background samples.** Whereas no DNA could be detected in the filter blanks (baked  
3 and unbaked), fungal DNA was detected in 4% of the extraction or PCR blank reactions,  
4 indicating that contaminations occurred rarely during analysis in the laboratory. The PCR  
5 products obtained from blank samples were cloned and sequenced, whereas PCR products of  
6 filter extracts obtained in these PCRs were excluded completely from the cloning reactions.  
7 However, the obtained sequences of blank samples and identical sequences obtained from the air  
8 filter samples were excluded from further analysis.

9 PCR is a powerful technique and the high sensitivity of this technique bears the risk of  
10 amplifying trace amounts of DNA with which the analysis material (e.g., reagents) may have  
11 been contaminated in the course of material production and analysis. Several studies described  
12 bacterial and fungal DNA contaminations in *Taq* Polymerase and commercially available  
13 reagents like lysis enzymes (Meier et al., 1993; Hughes et al., 1994; Loeffler et al., 1999). In our  
14 study the initially observed contaminations in the PCR blanks could not be detected anymore  
15 after performing the experiments with new reagents (new lot number). The detection of DNA in  
16 extraction blanks was likely due to contaminations originating from the PCR. Six species, e.g.,  
17 *Brettanomyces bruxellensis* and *Candida tropicalis* were only detected in extraction blanks.  
18 Possibly, they were laboratory contaminations of the extracts or contaminations occurred during  
19 extraction or PCR preparation in the laboratory (material used, extraction procedure). In total 11  
20 different OTUs (mostly yeast species, e.g., *Candida sake*, *Candida deformans*, *Candida*  
21 *tropicalis*, *Cryptococcus longus*) were identified as possible contaminants.

22 As described in Fröhlich-Nowoisky et al. (2009), no DNA was detected in the blank samples  
23 from Mainz, Germany, indicating that no contaminations occurred during sample handling and  
24 analysis in the laboratory. However, four of the OTUs identified as possible contaminants in the  
25 other sets of filter samples were detected in the samples from Mainz (*Candida deformans*,  
26 *Candida tropicalis*, *Nectria sp.*, *Alternaria sp.*). To avoid any bias in the comparison with other  
27 sample sets, we excluded the possible contaminations also from the statistical analysis of the  
28 Mainz samples.

29

1 **Emission and transport of fungal spores.** Air is the primary medium for the dispersal of fungal  
2 spores, which can be transported over long distances depending on spore properties and atmos-  
3 pheric conditions (Hirst et al., 1967; Brown et al., 2002). An essential condition for widespread  
4 dispersal is that the spores have to leave the laminar boundary layer at the surface and enter into  
5 turbulent air flow in the atmosphere (Gregory, 1973; Madelin, 1994; Lacey, 1996). This can be  
6 achieved through a range of active and passive discharge and liberation processes of spores (In-  
7 gold, 1971; Lacey, 1996; Elbert et al., 2007). The residence time of fungal spores in air depends  
8 on their size and decreases with increasing aerodynamic diameter (Gregory, 1973; Lacey, 1996).  
9 Because the spores of many BMC (~5-10  $\mu\text{m}$ ) are typically larger than those of prominent air-  
10 borne AMC (~2-5  $\mu\text{m}$ ) (Muilenberg, 1995; Lacey, 1996; Ingold, 2001; Stenlid, 2008; Fröhlich-  
11 Nowoisky et al., 2009), they are expected to be deposited more rapidly and are less likely to un-  
12 dergo long-range transport, as also indicated by global atmospheric transport model results (Fig.  
13 S4, Wilkinson et al. 2011).

14 Atmospheric loss processes can be conceptualized in an idealized manner as an exponential de-  
15 cay over time of the total particle mass remaining in the atmosphere. For particles emitted instan-  
16 taneously at time  $t=0$ , the remaining mass  $M$  is given by  $M(t) = M_0 \exp(-t/\tau)$ , with  $M_0$  the initial  
17 mass and  $\tau$  the size-dependent atmospheric residence time. In Figure S4, we show how this ideal-  
18 ized conceptualization of atmospheric loss processes would result in an increase in the abundance  
19 of the smaller AMC relative to the larger BMC over time, in an air parcel that had lost contact  
20 with the source.

21 Due to varying discharge mechanisms and meteorological conditions, the concentration and di-  
22 versity of airborne fungal spores are likely to vary with the time of day and altitude above  
23 ground. These effects should have no influence on the systematic differences between continental  
24 and marine sampling sites observed in this study. To develop a comprehensive understanding of  
25 temporal and spatial variability of the atmospheric biogeography and transport of fungi, however,  
26 we propose and intend to pursue further studies and experiments including air samples collected  
27 at different altitudes and distances from the coast.

## Supplementary Figures S1-S4

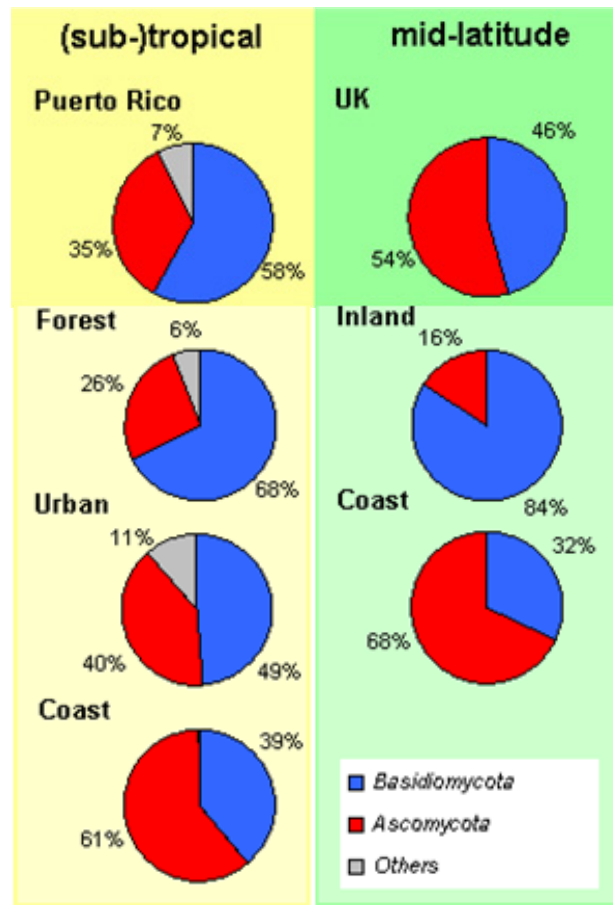

**Figure S1.** Species richness of airborne fungi: relative proportions of different phyla at different sampling sites in Puerto Rico (forest, urban, coast) and United Kingdom (UK; Inland = Chelmsford, Essex, Coast = Weybourne).

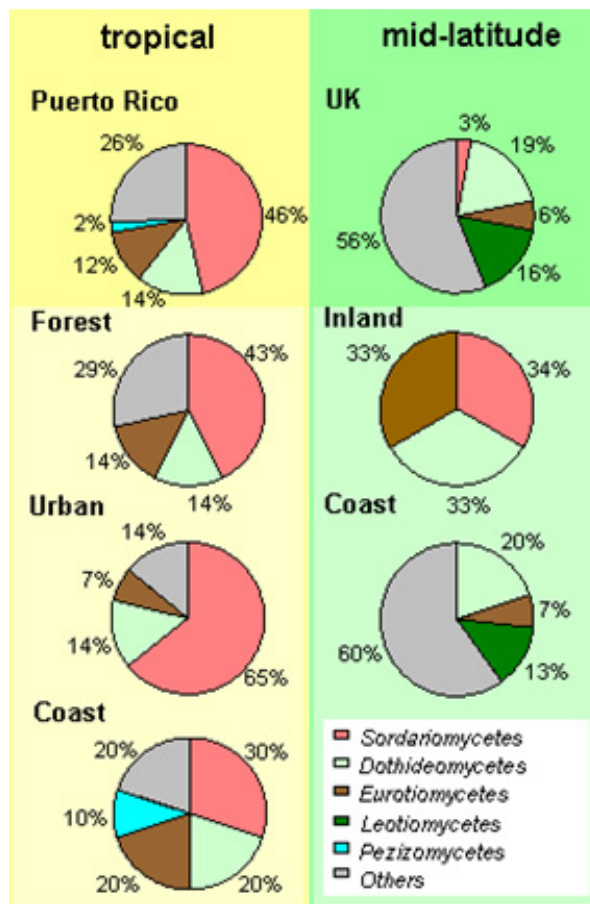

**Figure S2.** Species richness of airborne fungi: relative proportions of different classes of *Ascomycota* at different sampling sites in Puerto Rico (forest, urban, coast) and United Kingdom (UK; Inland = Chelmsford, Essex, Coast = Weybourne).

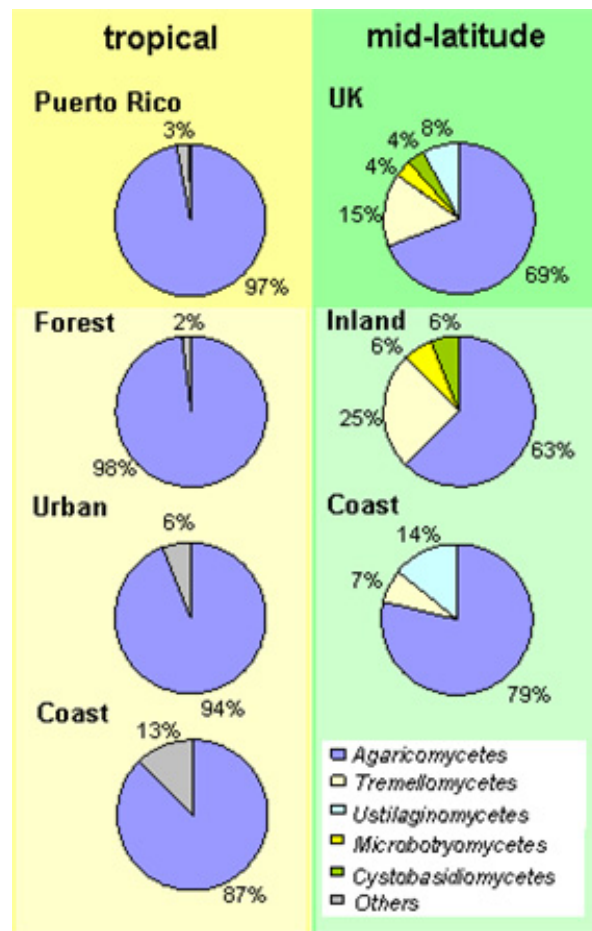

**Figure S3.** Species richness of airborne fungi: relative proportions of different classes of *Basidiomycota* at different sampling sites in Puerto Rico (forest, urban, coast) and United Kingdom (UK; Inland = Chelmsford, Essex, Coast = Weybourne).

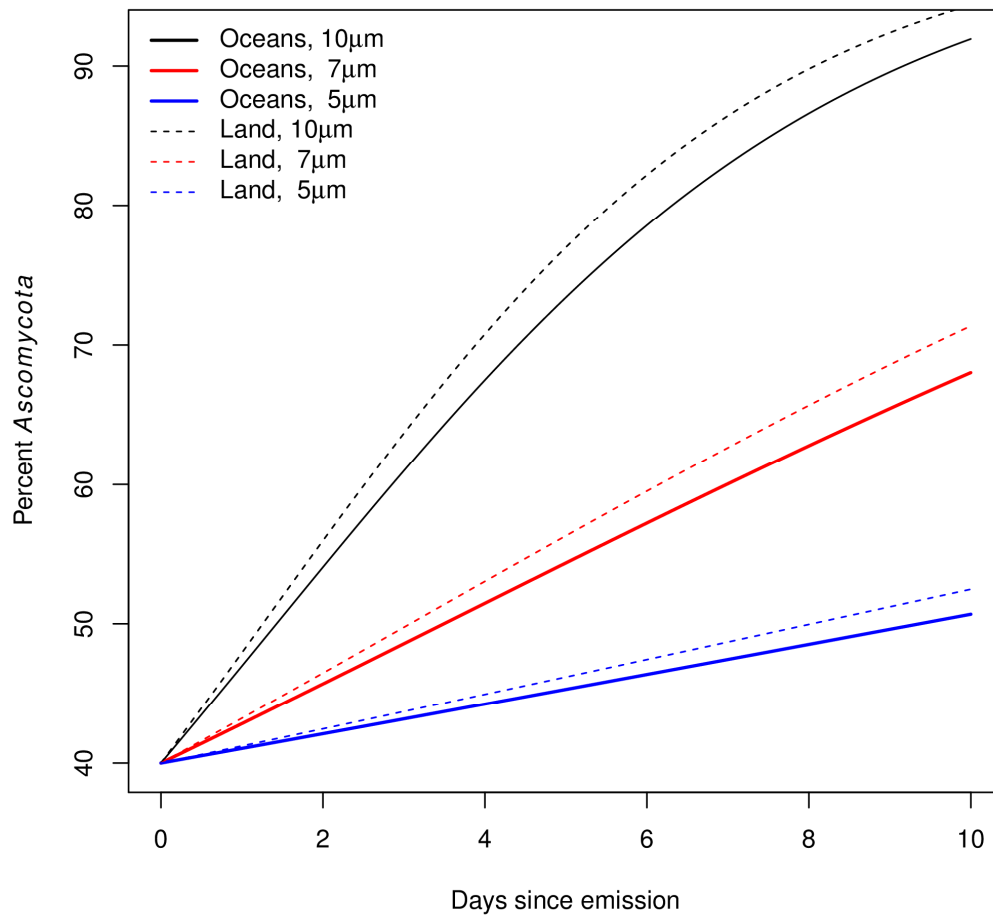

**Figure S4.** Increase in fraction of *Ascomycota* due to size-differentiated loss processes during idealized transport from a source over land and oceans.

*Ascomycota* were assumed to have an aerodynamic diameter of 3 μm, while the *Basidiomycota* aerodynamic diameter was assumed to be 5 μm, 7 μm or 10 μm.



## Supplementary Tables S1-S12

**Table S1. Overview and diversity parameters of aerosol filter samples and detected fungi.** Tropical (0-25°), mid-latitude (25-55°) and sub-polar (55-70°) sampling regions (continental, coastal – within 100 km of shoreline, marine); number of air samples, sampler, size range, total volume of air, and obtained DNA sequences; species richness (S measured, S\* estimated), Shannon index (H'), Shannon Evenness (E), and Simpson's index (D).

|                                       | Tropical, 0°-25° |             |         |            |                  | Mid-Latitude, 25°-55° |             |              |          | Sub-Polar,<br>55°-70° |                |
|---------------------------------------|------------------|-------------|---------|------------|------------------|-----------------------|-------------|--------------|----------|-----------------------|----------------|
| Sampling region                       | Arizona          | Brazil      | China   | Taiwan     | Puerto Rico      | Pacific/Indian Ocean  | Austria     | Germany      | UK       | Indian/Atlantic Ocean | Southern Ocean |
| Location                              | continental      | continental | coastal | coastal    | coastal          | marine                | continental | continental  | coastal  | marine                | marine         |
| Samples                               | 10               | 13          | 14      | 13         | 11               | 5                     | 4           | 42           | 12       | 2                     | 10             |
| Sampler                               | Hi- Vol          | Hi-Vol      | Hi-Vol  | Hi-Vol     | SFU              | Hi-Vol                | Hi-Vol      | Hi-Vol       | Hi-Vol   | Hi-Vol                | Hi-Vol         |
| Size range                            | PM10             | >3 µm       | TSP     | TSP, PM2.5 | <1.7 µm, >1.7 µm | TSP                   | PM10        | <3 µm, >3 µm | <4.49 µm | TSP                   | TSP            |
| Total volume of air (m <sup>3</sup> ) | 10381            | 416         | 14981   | 11569      | 1536             | 7448                  | 2968        | 112063       | 22416    | 2910                  | 17541          |
| Sequences                             | 93               | 193         | 267     | 142        | 199              | 81                    | 90          | 1316         | 156      | 32                    | 85             |
| S                                     | 31               | 100         | 90      | 56         | 124              | 31                    | 60          | 364          | 57       | 18                    | 33             |
| S*                                    | 135              | 436         | 255     | 268        | 988              | 162                   | 239         | 1120         | 183      | 163                   | 259            |
| H'                                    | 3.2              | 4.4         | 4.2     | 3.8        | 4.7              | 3.4                   | 4           | 5.2          | 3.9      | 2.9                   | 3.4            |
| E                                     | 0.93             | 0.95        | 0.93    | 0.96       | 0.98             | 0.99                  | 0.98        | 0.89         | 0.96     | 0.99                  | 0.99           |
| D                                     | 0.039            | 0.010       | 0.017   | 0.015      | 0.004            | 0.005                 | 0.02        | 0.009        | 0.015    | 0.006                 | 0.008          |

**Table S2. Austria. Overview of air samples.** Sample ID (running number, AT1,2: urban, AT3,4: suburban); sampling period; sampled air volume; number of DNA sequences; number of different species (OTU) of all fungi and of *Ascomycota* (AMC), and *Basidiomycota* (BMC), detected in the air sample.

| Sample ID | Sampling Period | Sampled air volume<br>(m <sup>3</sup> ) | Sequences | Species |     |     |
|-----------|-----------------|-----------------------------------------|-----------|---------|-----|-----|
|           |                 |                                         |           | Fungi   | AMC | BMC |
| AT1       | 07.07.2005      | 730                                     | 14        | 12      | 9   | 2   |
| AT2       | 07.07.2005      | 752                                     | 33        | 24      | 4   | 19  |
| AT3       | 19.07.2005      | 739                                     | 21        | 18      | 6   | 11  |
| AT4       | 19.07.2005      | 747                                     | 22        | 19      | 9   | 9   |

**Table S3. Arizona. Overview of air samples.** Sample ID (running number; c = coarse, f = fine); sampling period; sampled air volume; number of DNA sequences, number of different species (OTU) of all fungi and of *Ascomycota* (AMC), and *Basidiomycota* (BMC), detected in the air sample.

| Sample ID | Sampling Period         | Sampled air volume (m <sup>3</sup> ) | Sequences | Species |     |     |
|-----------|-------------------------|--------------------------------------|-----------|---------|-----|-----|
|           |                         |                                      |           | Fungi   | AMC | BMC |
| ARZ1c     | 18.02.2009 - 19.02.2009 | 1296                                 | 8         | 6       | 5   | 1   |
| ARZ2c     | 18.02.2009 - 19.02.2009 | 1296                                 | 14        | 8       | 2   | 6   |
| ARZ3f     | 18.02.2009 - 19.02.2009 | 1296                                 | 11        | 3       | 3   | 0   |
| ARZ4f     | 18.02.2009 - 19.02.2009 | 1296                                 | 15        | 4       | 3   | 1   |
| ARZ5f     | 18.02.2009 - 19.02.2009 | 1296                                 | 11        | 5       | 4   | 1   |
| ARZ6c     | 24.02.2009              | 6.3                                  | 0         | 0       | 0   | 0   |
| ARZ7c     | 24.02.2009 - 25.02.2009 | 1296                                 | 9         | 8       | 3   | 5   |
| ARZ8f     | 24.02.2009 - 25.02.2009 | 1296                                 | 9         | 6       | 3   | 3   |
| ARZ9c     | 02.03.2009              | 6.3                                  | 3         | 2       | 2   | 0   |
| ARZ10f    | 02.03.2009 - 03.03.2009 | 1296                                 | 13        | 8       | 3   | 5   |

**Table S4. Brazil. Overview of air samples.** Sample ID (running number, sampling period; sampled air volume; number of DNA sequences; number of different species (OTU) of all fungi and of *Ascomycota* (AMC), and *Basidiomycota* (BMC), detected in the air sample.

| Sample ID | Sampling Period         | Sampled air volume (m <sup>3</sup> ) | Sequences | Species |     |     |
|-----------|-------------------------|--------------------------------------|-----------|---------|-----|-----|
|           |                         |                                      |           | Fungi   | AMC | BMC |
| BR1       | 16.09.2002 - 17.09.2002 | 19                                   | 20        | 13      | 2   | 11  |
| BR2       | 22.09.2002 - 22.09.2002 | 17                                   | 6         | 4       | 4   | 0   |
| BR3       | 22.09.2002 - 23.09.2002 | 21                                   | 14        | 10      | 7   | 3   |
| BR4       | 28.09.2002 - 28.09.2002 | 16                                   | 23        | 14      | 7   | 6   |
| BR5       | 02.10.2002 - 03.10.2002 | 21                                   | 19        | 11      | 1   | 10  |
| BR6       | 06.10.2002 - 07.10.2002 | 20                                   | 14        | 8       | 3   | 5   |
| BR7       | 07.10.2002 - 07.10.2002 | 16                                   | 9         | 10      | 10  | 0   |
| BR8       | 09.10.2002 - 10.10.2002 | 38                                   | 17        | 9       | 2   | 7   |
| BR9       | 18.10.2002 - 19.10.2002 | 38                                   | 12        | 9       | 0   | 9   |
| BR10      | 01.11.2002 - 04.11.2002 | 64                                   | 12        | 12      | 4   | 8   |
| BR11      | 01.11.2002 - 04.11.2002 | 80                                   | 23        | 19      | 5   | 14  |
| BR12      | 10.11.2002 - 12.11.2002 | 66                                   | 24        | 22      | 3   | 18  |

**Table S5. China. Overview of air samples.** Sample ID (running number); sampling period; sampled air volume (n.a. = not available); number of DNA sequences; number of different species (OTU) of all fungi and of *Ascomycota* (AMC), and *Basidiomycota* (BMC), detected in the air sample.

| Sample ID | Sampling Period         | Sampled air volume (m <sup>3</sup> ) | Sequences | Species |     |     |
|-----------|-------------------------|--------------------------------------|-----------|---------|-----|-----|
|           |                         |                                      |           | Fungi   | AMC | BMC |
| CN1       | 4.07.2006               | 334                                  | 40        | 27      | 13  | 14  |
| CN2       | 7.07.2006               | 800                                  | 13        | 6       | 6   | 0   |
| CN3       | 9.07.2006 - 10.07.2006  | 1158                                 | 8         | 6       | 4   | 2   |
| CN4       | 10.07.2006 - 11.07.2006 | n.a.                                 | 15        | 7       | 7   | 0   |
| CN5       | 11.07.2006 - 12.07.2006 | 1158                                 | 12        | 3       | 2   | 1   |
| CN6       | 12.07.2006 - 13.07.2006 | 1435                                 | 25        | 20      | 14  | 6   |
| CN7       | 13.07.2006 - 14.07.2006 | 1431                                 | 23        | 13      | 8   | 5   |
| CN8       | 14.07.2006 - 15.07.2006 | 1431                                 | 18        | 6       | 6   | 0   |
| CN9       | 15.07.2006 - 16.07.2006 | 1598                                 | 15        | 6       | 6   | 0   |
| CN10      | 16.07.2006 - 17.07.2006 | 1506                                 | 8         | 5       | 5   | 0   |
| CN11      | 17.07.2006 - 18.07.2006 | 1197                                 | 34        | 9       | 6   | 3   |
| CN12      | 25.07.2006              | 146                                  | 18        | 12      | 12  | 0   |
| CN13      | 28.07.2006 - 29.07.2006 | 1424                                 | 22        | 12      | 11  | 1   |
| CN14      | 29.07.2006 - 30.07.2006 | 1363                                 | 16        | 10      | 10  | 0   |

**Table S6. Puerto Rico. Overview of air samples.** Sample ID (running number; PR1-4 = forest, PR5-7 = urban, PR 8-11 = coast, N = Nuclepore, Q = quartz fiber filter); sampling period; sampled air volume; number of DNA sequences; number of different species (OTU) of all fungi and of *Ascomycota* (AMC), and *Basidiomycota* (BMC), detected in the air sample.

| Sample ID | Sampling Period          | Sampled air volume<br>(m <sup>3</sup> ) | Sequences | Species |     |     |
|-----------|--------------------------|-----------------------------------------|-----------|---------|-----|-----|
|           |                          |                                         |           | Fungi   | AMC | BMC |
| PR1N      | 06.07.2007 - 09.07.2007  | 160                                     | 21        | 17      | 5   | 11  |
| PR2Q      | 25.07.2007 - 27.07.2007  | 110                                     | 32        | 22      | 1   | 20  |
| PR3N      | 25.07.2007 - 27.07.2007  | 110                                     | 37        | 30      | 5   | 25  |
| PR4N      | 31.07.2007 - 02.08.2007  | 78                                      | 24        | 21      | 10  | 8   |
| PR5N      | 01.07. 2007 - 03.07.2007 | 269                                     | 4         | 3       | 2   | 1   |
| PR6Q      | 27.07.2007 - 29.07.2007  | 269                                     | 2         | 1       | 1   | 0   |
| PR7N      | 29.07.2007 - 31.07.2007  | 269                                     | 20        | 15      | 8   | 7   |
| PR8Q      | 02.07.2007 - 03.07. 2007 | 56                                      | 13        | 2       | 0   | 2   |
| PR9N      | 02.07.2007 - 03.07. 2007 | 56                                      | 10        | 10      | 6   | 4   |
| PR10N     | 31.07.2007 - 02.08.2007  | 101                                     | 21        | 17      | 3   | 11  |
| PR11N     | 01.07. 2007 - 02.07.2007 | 58                                      | 15        | 12      | 6   | 5   |

**Table S7. Taiwan. Overview of air samples.** Sample ID (running number, TW1-2: Yunlin County, TSP; TW3-11: Taipei (Nangang), PM2.5; TW12,13: Liouguei Shanping, PM2.5); sampling period; sampled air volume; number of DNA sequences; number of different species (OTU) of all fungi and of *Ascomycota* (AMC), and *Basidiomycota* (BMC), detected in the air sample.

| Sample ID | Sampling Period         | Sampled air volume (m <sup>3</sup> ) | Sequences | Species |     |     |
|-----------|-------------------------|--------------------------------------|-----------|---------|-----|-----|
|           |                         |                                      |           | Fungi   | AMC | BMC |
| TW1       | 06.10.2006 - 08.10.2006 | 3109                                 | 18        | 6       | 6   | 0   |
| TW2       | 29.03.2007 - 30.03.2007 | 1533                                 | 20        | 10      | 10  | 0   |
| TW3       | 20.04.2007 - 21.04.2007 | 753                                  | 7         | 4       | 1   | 3   |
| TW4       | 23.05.2007 - 24.05.2007 | 748                                  | 11        | 5       | 2   | 3   |
| TW5       | 20.06.2007 - 20.06.2007 | 9                                    | 6         | 3       | 2   | 1   |
| TW6       | 24.08.2007 - 25.08.2007 | 673                                  | 24        | 18      | 10  | 8   |
| TW7       | 26.09.2007 - 27.09.2007 | 703                                  | 11        | 8       | 3   | 5   |
| TW8       | 11.12.2007 - 12.12.2007 | 741                                  | 6         | 3       | 2   | 1   |
| TW9       | 29.11.2007 - 29.11.2007 | 752                                  | 0         | 0       | 0   | 0   |
| TW10      | 26.03.2008 - 27.03.2008 | 766                                  | 0         | 0       | 0   | 0   |
| TW11      | 11.06.2008 - 11.06.2008 | 655                                  | 24        | 11      | 8   | 3   |
| TW12      | 26.02.2008 - 26.02.2008 | 552                                  | 15        | 7       | 7   | 0   |
| TW13      | 27.03.2008 - 27.03.2008 | 575                                  | 0         | 0       | 0   | 0   |

**Table S8. United Kingdom. Overview of air samples.** Sample ID (running number, UK1-9: Weybourne; UK10-12: Chelmsford, Essex); sampling period; sampled air volume (n.a. = not available); number of DNA sequences; number of different species (OTU) of all fungi and of *Ascomycota* (AMC), and *Basidiomycota* (BMC), detected in the air sample.

| Sample ID | Sampling Period         | Sampled air volume (m <sup>3</sup> ) | Sequences | Species |     |     |
|-----------|-------------------------|--------------------------------------|-----------|---------|-----|-----|
|           |                         |                                      |           | Fungi   | AMC | BMC |
| UK1       | 06.05.2004 - 13.05.2004 | 2168                                 | 32        | 15      | 5   | 10  |
| UK2       | 06.05.2004 - 13.05.2004 | 2168                                 | 10        | 7       | 5   | 2   |
| UK3       | 06.05.2004 - 13.05.2004 | 2168                                 | 17        | 12      | 8   | 4   |
| UK4       | 15.05.2004 - 21.05.2004 | 2372                                 | 10        | 10      | 9   | 1   |
| UK5       | 15.05.2004 - 21.05.2004 | 2372                                 | 15        | 5       | 3   | 2   |
| UK6       | 06.05.2004 - 13.05.2004 | 2168                                 | 29        | 11      | 9   | 2   |
| UK7       | 06.05.2004 - 13.05.2004 | 2168                                 | 2         | 1       | 1   | 0   |
| UK8       | 06.05.2004 - 13.05.2004 | 2168                                 | 5         | 3       | 3   | 0   |
| UK9       | 23.05.2004 - 25.05.2004 | 1868                                 | 0         | 0       | 0   | 0   |
| UK10      | 31.07.2003 - 01.08.2003 | 932                                  | 10        | 9       | 3   | 6   |
| UK11      | 31.07.2003 - 01.08.2003 | 932                                  | 10        | 8       | 0   | 8   |
| UK12      | 31.07.2003 - 01.08.2003 | 932                                  | 16        | 6       | 0   | 6   |



**Table S9. Ocean. Overview of air samples.** Sample ID (running number; t = tropical, m = mid-latitude, s = sub-polar); sampling period; sampled air volume; number of DNA sequences; number of different species (OTU) of all fungi and of *Ascomycota* (AMC), and *Basidiomycota* (BMC), detected in the air sample.

| Sample ID | Latitude and Longitude<br>(Start, Stop) | Sampling Period            | Sampled<br>air volume<br>(m <sup>3</sup> ) | Sequences | Species |     |     |
|-----------|-----------------------------------------|----------------------------|--------------------------------------------|-----------|---------|-----|-----|
|           |                                         |                            |                                            |           | Fungi   | AMC | BMC |
| Ocean1t   | 6° 01.834'N<br>126°08.646'E             | 20.11.2007 -<br>21.11.2007 | 1489                                       | 16        | 10      | 5   | 5   |
|           | 2° 09.753'N<br>121°23.469'E             |                            |                                            |           |         |     |     |
| Ocean2t   | 7° 28.502'S<br>116°12.211'E             | 23.11.2007 -<br>24.11.2007 | 1430                                       | 23        | 9       | 9   | 0   |
|           | 12° 55.520'S<br>115°02.886'E            |                            |                                            |           |         |     |     |
| Ocean3s   | 58° 54.304'S<br>118°22.719'E            | 05.12.2007 -<br>06.12.2007 | 1346                                       | 37        | 18      | 15  | 3   |
|           | 61° 59.844'S<br>108°27.573'E            |                            |                                            |           |         |     |     |
| Ocean4s   | 62° 08.983'S<br>84° 24.899'E            | 08.12.2007 -<br>11.12.2007 | 1495                                       | 3         | 1       | 1   | 0   |
|           | 69° 10.874'S<br>76° 27.475'E            |                            |                                            |           |         |     |     |
| Ocean5s   | 69° 09.422'S<br>74° 28.306'E            | 24.12.2007 -<br>25.12.2007 | 771                                        | 1         | 1       | 0   | 1   |
|           | 65° 17.598'S<br>66° 31.963'E            |                            |                                            |           |         |     |     |
| Ocean6s   | 65° 17.598'S<br>66° 31.963'E            | 25.12.2007 -<br>25.12.2007 | 0.08                                       | 11        | 3       | 2   | 1   |
|           | 65° 17.598'S<br>66° 31.963'E            |                            |                                            |           |         |     |     |
| Ocean7s   | 60° 47.493'S<br>3° 54.103'E             | 30.12.2007 -<br>31.12.2007 | 1506                                       | 0         | 0       | 0   | 0   |
|           | 60° 25.741'S<br>8° 28.707'W             |                            |                                            |           |         |     |     |
| Ocean8s   | 62° 12.696'S<br>58° 50.063'W            | 08.01.2008 -<br>11.01.2008 | 2762                                       | 19        | 8       | 8   | 0   |
|           | 62° 13.681'S                            |                            |                                            |           |         |     |     |

|          |                              |                            |      |    |    |    |   |
|----------|------------------------------|----------------------------|------|----|----|----|---|
|          | 58° 55.845'W                 |                            |      |    |    |    |   |
| Ocean9s  | 62° 13.727'S<br>58° 55.634'W | 14.01.2008 -<br>17.01.2008 | 2498 | 0  | 0  | 0  | 0 |
|          | 62° 13.727'S<br>58° 55.634'W |                            |      |    |    |    |   |
| Ocean10m | 35° 10.156'S<br>56° 43.431'W | 30.01.2008 -<br>31.01.2008 | 1457 | 26 | 17 | 11 | 6 |
|          | 39° 55.270'S<br>56° 48.748'W |                            |      |    |    |    |   |
| Ocean11s | 62° 12.711'S<br>58° 49.786'W | 05.02.2008 -<br>08.02.2008 | 2349 | 9  | 4  | 4  | 0 |
|          | 62° 12.998'S<br>58° 47.837'W |                            |      |    |    |    |   |
| Ocean12s | 67° 15.738'S<br>5° 59.665'E  | 15.02.2008 -<br>16.02.2008 | 1471 | 2  | 1  | 1  | 0 |
|          | 68° 44.103'S<br>16° 23.771'E |                            |      |    |    |    |   |
| Ocean13s | 68° 32.667'S<br>74° 09.847'E | 05.03.2008 -<br>10.03.2008 | 3343 | 3  | 1  | 1  | 0 |
|          | 69° 19.562'S<br>76° 24.163'E |                            |      |    |    |    |   |
| Ocean14m | 38° 02.528'S<br>102°30.047'E | 19.03.2008 -<br>20.03.2008 | 1453 | 6  | 2  | 2  | 0 |
|          | 34° 59.579'S<br>108°58.767'E |                            |      |    |    |    |   |
| Ocean15t | 20° 33.840'S<br>113°49.027'E | 31.03.2008 -<br>01.04.2008 | 1509 | 13 | 3  | 3  | 0 |
|          | 14° 18.054'S<br>114°50.985'E |                            |      |    |    |    |   |
| Ocean16t | 2° 45.389'N<br>122°07.267'E  | 04.04.2008 -<br>05.04.2008 | 1508 | 29 | 12 | 8  | 5 |
|          | 6° 30.222'N<br>126°34.222'E  |                            |      |    |    |    |   |
| Ocean17t | 17° 49.631'N<br>125°59.808'E | 07.04.2008 -<br>08.04.2008 | 1512 | 0  | 0  | 0  | 0 |
|          | 24° 14.915'N<br>126°00.153'E |                            |      |    |    |    |   |

---

**Table S10. Selected species.** Class attribution and relative frequency of occurrence of species that can act as ice nuclei for different sampling regions (*RFO* = Proportion of samples in which the species were detected).

| species                  | class                  | RFO (%) |         |        |       |         |             |        |    |       |
|--------------------------|------------------------|---------|---------|--------|-------|---------|-------------|--------|----|-------|
|                          |                        | Austria | Arizona | Brazil | China | Germany | Puerto Rico | Taiwan | UK | Ocean |
| <i>Cladosporium spp.</i> | <i>Dothideomycetes</i> | 50      | 60      | 15     | 86    | 98      | 27          | 54     | 42 | 18    |
| <i>Fusarium spp.</i>     | <i>Sordariomycetes</i> | -       | -       | -      | -     | 2       | 9           | -      | -  | -     |
| <i>Microdochium spp.</i> | <i>Sordariomycetes</i> | 25      | -       | 8      | -     | -       | -           | -      | 8  | -     |
| <i>Penicillium spp.</i>  | <i>Eurotiomycetes</i>  | 50      | -       | -      | 50    | 57      | 36          | -      | -  | 59    |

**Table S11. PCR primer combinations.** Forward and reverse primer names, annealing temperature, and references. The amplified region was the 5.8S rRNA gene and both internal transcribed spacer regions (ITS1, ITS2).

| Primer pair | Forward | Reverse | Temperature (°C) | References                                              |
|-------------|---------|---------|------------------|---------------------------------------------------------|
| First PCR   |         |         |                  |                                                         |
| A           | ITS5    | ITS4A   | 55               | Nikolcheva and Bärlocher., 2004;<br>White et al., 1990  |
| B           | ITS5    | ITS4B   | 58               | Nikolcheva and Bärlocher., 2004;<br>White et al., 1990  |
| C           | Glom1   | Glom2   | 54               | Renker et al., 2003                                     |
| Second PCR  |         |         |                  |                                                         |
| D           | ITS5    | ITS4    | 54               | White et al., 1990                                      |
| E           | ITS1    | ITS4B   | 58               | Nikolcheva and Bärlocher., 2004;<br>Fierer et al., 2005 |
| F           | ITS1    | ITS4A   | 55               | Nikolcheva and Bärlocher., 2004;<br>Fierer et al., 2005 |

**Table S12. Statistical parameters.**

| Symbol | Quantity/Definition                                                                                                                                                                                                                     |
|--------|-----------------------------------------------------------------------------------------------------------------------------------------------------------------------------------------------------------------------------------------|
| $D$    | Simpson's index (Hill et al., 2003), $D = \sum_{i=1}^S \frac{n_i(n_i - 1)}{N(N - 1)}$                                                                                                                                                   |
| $E$    | Shannon evenness, $E = H' / \ln S$                                                                                                                                                                                                      |
| $H'$   | Shannon index, $H' = - \sum_{i=1}^S P_i \ln P_i$                                                                                                                                                                                        |
| $n_i$  | Frequency of occurrence of an individual species $i$ (number of samples in which species $i$ was detected)                                                                                                                              |
| $N$    | Cumulative frequency of occurrence of investigated species, $N = \sum_{i=1}^S n_i$                                                                                                                                                      |
| $P_i$  | Relative proportion of an individual species $i$ , $P_i = n_i / N$                                                                                                                                                                      |
| $S$    | Species richness measured (number of detected species)                                                                                                                                                                                  |
| $S^*$  | Species richness estimated with the Chao-1 approach (Chao et al., 1984; Hill et al., 2003), $S^* = S + a^2 / (2b)$ ,<br>$a$ = number of species detected only once (singletons),<br>$b$ = number of species detected twice (doubletons) |

## Supplementary References

- Brown, J. K. M. and Hovmøller, M. S.: Aerial dispersal of pathogens on the global and continental scales and its impact on plant disease, *Science*, 297, 537–541, 2002.
- Chao, A.: Nonparametric-Estimation of the Number of Classes in a Population, *Scand. J. Stat.*, 11, 265-270, 1984.
- Elbert, W., Taylor, P. E., Andreae, M. O., and Pöschl, U.: Contribution of fungi to primary biogenic aerosols in the atmosphere: wet and dry discharged spores, carbohydrates, and inorganic ions, *Atmos. Chem. Phys.*, 7, 4569–4588, 2007.
- Fierer, N., Jackson, J. A., Vilgalys, R., and Jackson, R. B.: Assessment of soil microbial community structure by use of taxon-specific quantitative PCR assays, *Appl. Environ. Microbiol.*, 71, 4117-4120, 2005.
- Fröhlich-Nowoisky, J., Pickersgill, D. A., Despres, V. R., and Pöschl, U.: High diversity of fungi in air particulate matter, *Proc. Natl Acad. Sci. USA*, 106, 12814-12819, 10.1073/pnas.0811003106, 2009.
- Gregory, P. H.: The microbiology of the atmosphere, 2nd ed., Plant Science Monographs, edited by: Polunin, N., Leonard Hill Books, Aylesbury, 377 pp., 1973.
- Hill, T. C. J., Walsh, K. A., Harris, J. A., and Moffett, B. F.: Using ecological diversity measures with bacterial communities, *FEMS Microbiol. Ecol.*, 43, 1-11, 2003.
- Hirst, J. M., Stedman, O. J., and Hurst, G. W.: Long-distance spore transport - Vertical sections of spore clouds over sea, *Journal of General Microbiology*, 48, 357-377, 1967.
- Hughes, M. S., Beck, L. A., and Skuce, R. A.: Identification and elimination of DNA sequences in Taq DNA polymerase, *J. Clin. Microbiol.*, 32, 2007-2008, 1994.
- Ingold, C. T.: Fungal spores. Their liberation and dispersal, Clarendon Press, Oxford, 1971.
- Ingold, C. T.: Range in size and form of basidiospores and ascospores, *Mycologist*, 15, 165–166, 2001.
- Lacey, J.: Spore dispersal – its role in ecology and disease: the British contribution to fungal aerobiology, *Mycol Res*, 100, 641-660, 1996.
- Loeffler, J., Hebart, H., Bialek, R., Hagemeyer, L., Schmidt, D., Serey, F.-P., Hartmann, M., Eucker, J., and Einsele, H.: Contaminations Occurring in Fungal PCR Assays, *J. Clin. Microbiol.*, 37, 1200-1202, 1999.
- Madelin, T. M.: Fungal aerosols: A review, *J. Aerosol Sci.*, 25, 1405-1412, 1994.
- Meier, A., Persing, D. H., Finken, M., and Bottger, E. C.: Elimination of contaminating DNA within polymerase chain reaction reagents: implications for a general approach to detection of uncultured pathogens, *J. Clin. Microbiol.*, 31, 646-652, 1993.
- Muilenberg ML. The outdoor aerosol. In: Burge HA, ed. *Bioaerosols*, Boca Raton: CRC Press, 1995:163-204.

- Nikolcheva, L. G., and Bärlocher, F.: Taxon-specific fungal primers reveal unexpectedly high diversity during leaf decomposition in a stream, *Mycol. Prog.*, 3, 41-49, 2004.
- Renker: Combining nested PCR and restriction digest of the internal transcribed spacer region to characterize arbuscular mycorrhizal fungi on roots from the field, *Mycorrhiza*, 13, 191-198, DOI 10.1007/s00572-002-0214-5, 2003.
- Rimek, D., Garg, A. P., Haas, W. H., and Kappe, R.: Identification of Contaminating Fungal DNA Sequences in Zymolyase, *J. Clin. Microbiol.*, 37, 830-831, 1999.
- Stenlid J.: Population biology of forest decomposer basidiomycetes. In: Boddy L, Frankland JC, van West P (eds) *Ecology of saprotrophic basidiomycetes*. Academic Press, Amsterdam, pp 105–122, 2008.
- White, T. J., Bruns, T., Lee, S., and Taylor, J.: Amplification and Direct Sequencing of Fungal Ribosomal RNA genes for Phylogenetics, in *Pcr Protocols: a Guide to Methods and Applications*. eds. Innis, M. A., D. H. Gelfand, J. J. Sninsky, and T. J. White. (Academic Press, Inc., New York), pp. 315-322, 1990.
- Wilkinson, D. M., Koumoutsaris, S., Mitchell, E. A. D., and Bey, I.: Modelling the effect of size on the aerial dispersal of microorganisms. *Journal of Biogeography*. doi: 10.1111/j.1365-2699.2011.02569.x, 2011.
